# Supplementary material for: Deep Learning Classifies Low- and High-Grade Glioma Patients with High Accuracy, Sensitivity, and Specificity Based on Their Brain White Matter Networks Derived from Diffusion Tensor Imaging
Source: MDPI journal article supplement (doi:10.3390/diagnostics12123216), 2022-12-19
Supplement: s1 [file s1]

## SUPPLEMENTARY TABLE

**Table S1.** DesikanDKT Atlas parcellated brain regions are given from 0-61 nodes representing the x and y axis in the connectivity matrix.

| NODES(0-62) | ROI                             |    |                                  |
|-------------|---------------------------------|----|----------------------------------|
| 0           | left_caudal_anterior_cingulate  | 31 | right_superior_temporal          |
| 1           | left_caudal_middle_frontal      | 32 | right_caudal_anterior_cingulate  |
| 2           | left_cuneus                     | 33 | right_caudal_middle_frontal      |
| 3           | left_entorhinal                 | 34 | right_cuneus                     |
| 4           | left_fusiform                   | 35 | right_entorhinal                 |
| 5           | left_inferior_parietal          | 36 | right_fusiform                   |
| 6           | left_inferior_temporal          | 37 | right_inferior_parietal          |
| 7           | left_isthmus_cingulate          | 38 | right_inferior_temporal          |
| 8           | left_lateral_occipital          | 39 | right_isthmus_cingulate          |
| 9           | left_lateral_orbitofrontal      | 40 | right_lateral_occipital          |
| 10          | left_lingual                    | 41 | right_lateral_orbitofrontal      |
| 11          | left_medial_orbitofrontal       | 42 | right_lingual                    |
| 12          | left_middle_temporal            | 43 | right_medial_orbitofrontal       |
| 13          | left_parahippocampal            | 44 | right_middle_temporal            |
| 14          | left_paracentral                | 45 | right_parahippocampal            |
| 15          | left_pars_opercularis           | 46 | right_paracentral                |
| 16          | left_pars_orbitalis             | 47 | right_pars_opercularis           |
| 17          | left_pars_triangularis          | 48 | right_pars_orbitalis             |
| 18          | left_pericalcarine              | 49 | right_pars_triangularis          |
| 19          | left_postcentral                | 50 | right_pericalcarine              |
| 20          | left_posterior_cingulate        | 51 | right_postcentral                |
| 21          | left_precentral                 | 52 | right_posterior_cingulate        |
| 22          | left_precuneus                  | 53 | right_precentral                 |
| 23          | left_rostral_anterior_cingulate | 54 | right_precuneus                  |
| 24          | left_rostral_middle_frontal     | 55 | right_rostral_anterior_cingulate |
| 25          | left_superior_frontal           | 56 | right_rostral_middle_frontal     |
| 26          | left_superior_parietal          | 57 | right_superior_frontal           |
| 27          | left_superior_temporal          | 58 | right_superior_parietal          |
| 28          | left_supramarginal              | 59 | right_supramarginal              |
| 29          | left_transverse_temporal        | 60 | right_transverse_temporal        |
| 30          | left_insula                     | 61 | right_insula                     |

left- brain left hemisphere

right - brain right hemisphere
